# Supplementary material for: Synthesis, Theoretical Calculation, and Biological Studies of Mono- and Diphenyltin(IV) Complexes of N-Methyl-N-hydroxyethyldithiocarbamate
Source: MDPI journal article supplement (doi:10.3390/molecules27092947), 2022-05-05
Supplement: s1 [file s1]

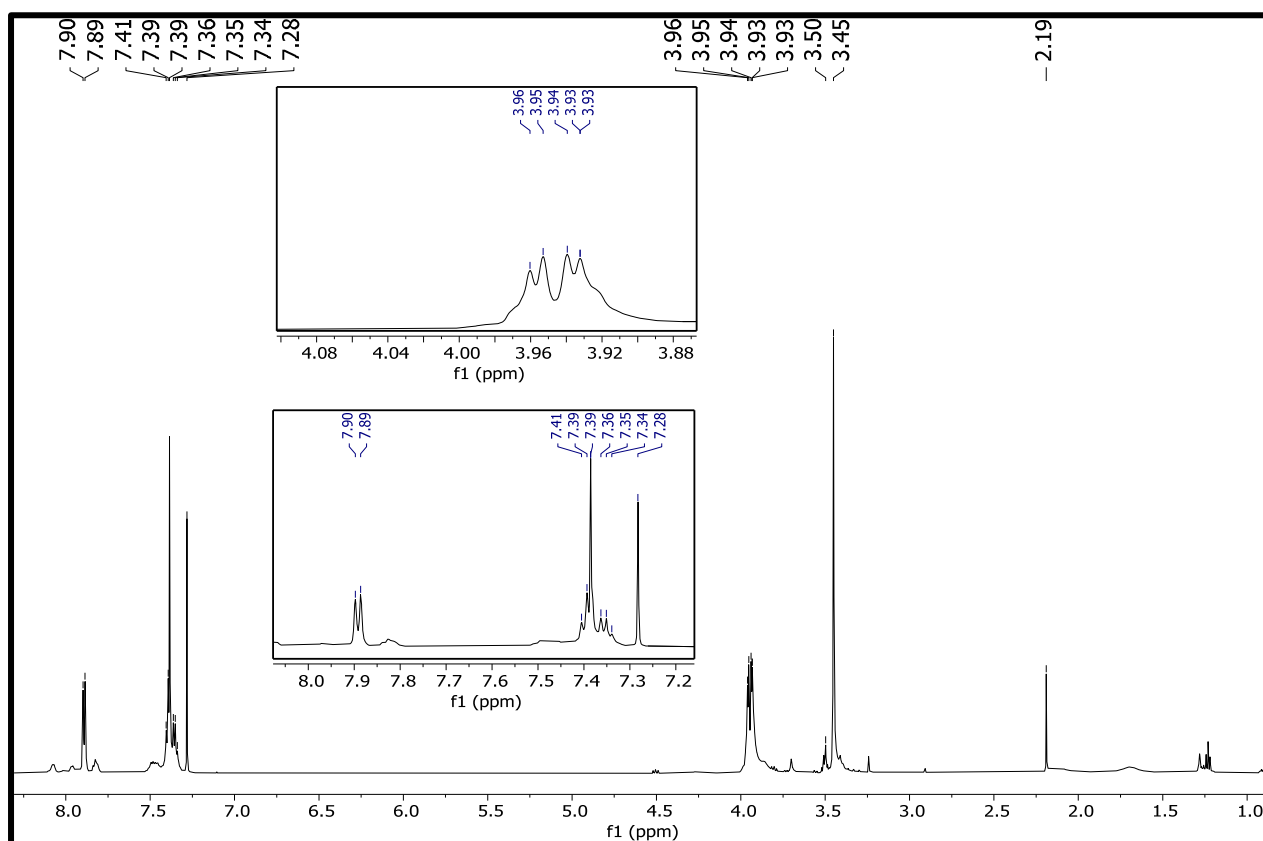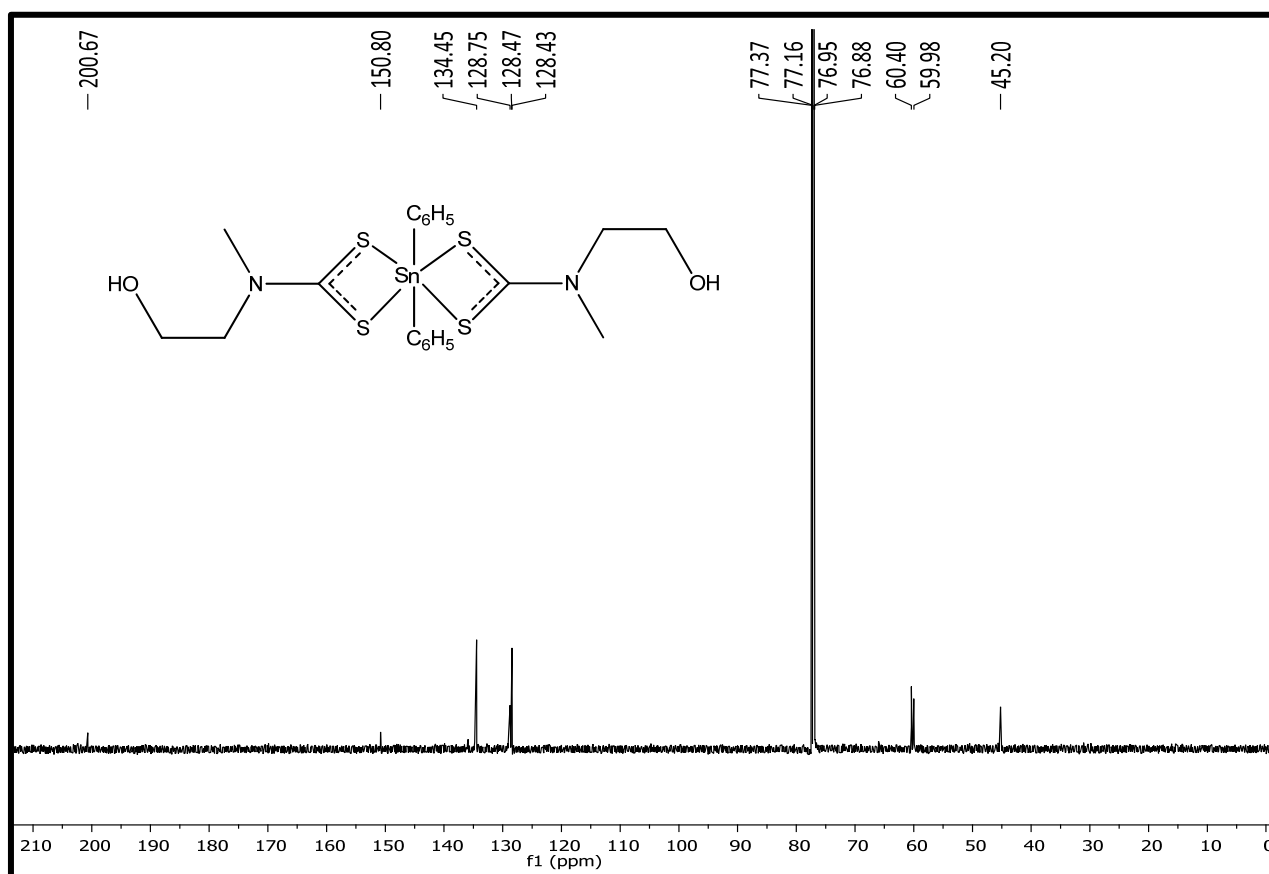

(a)

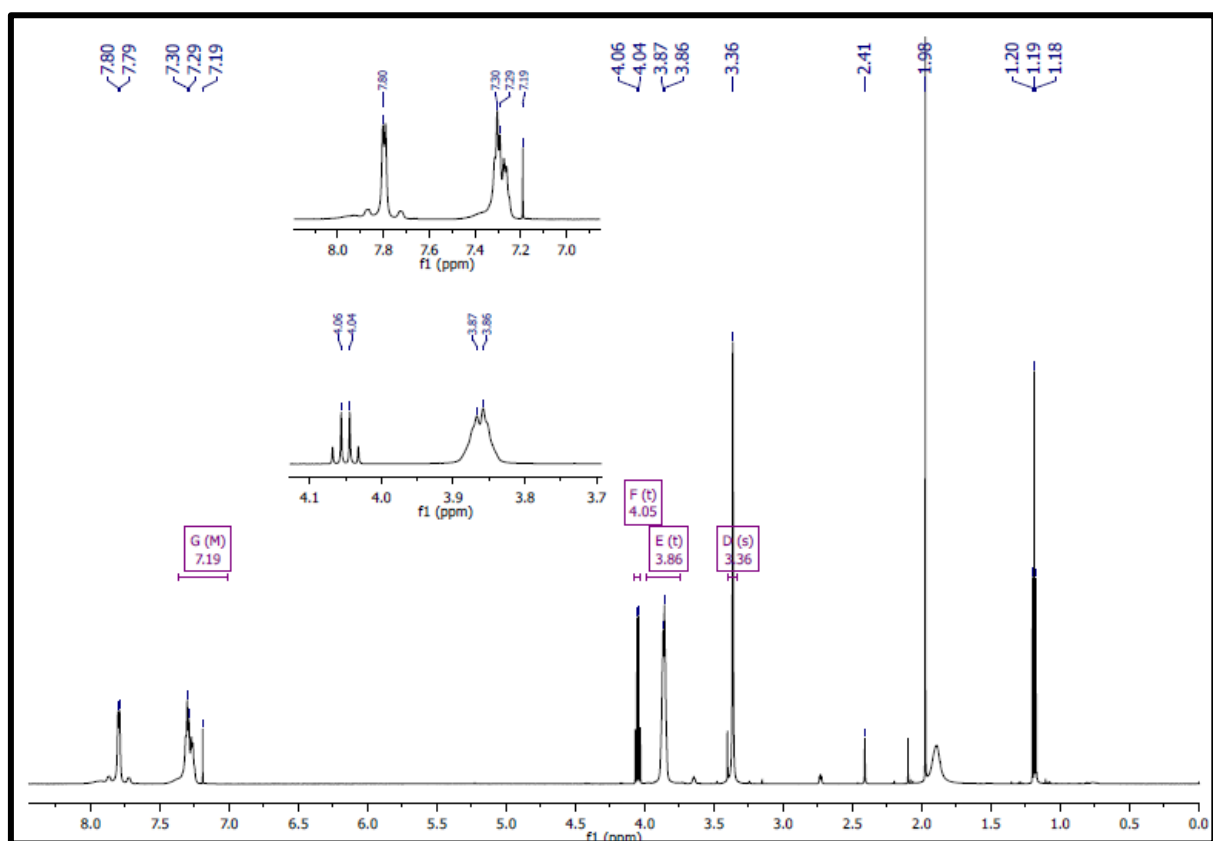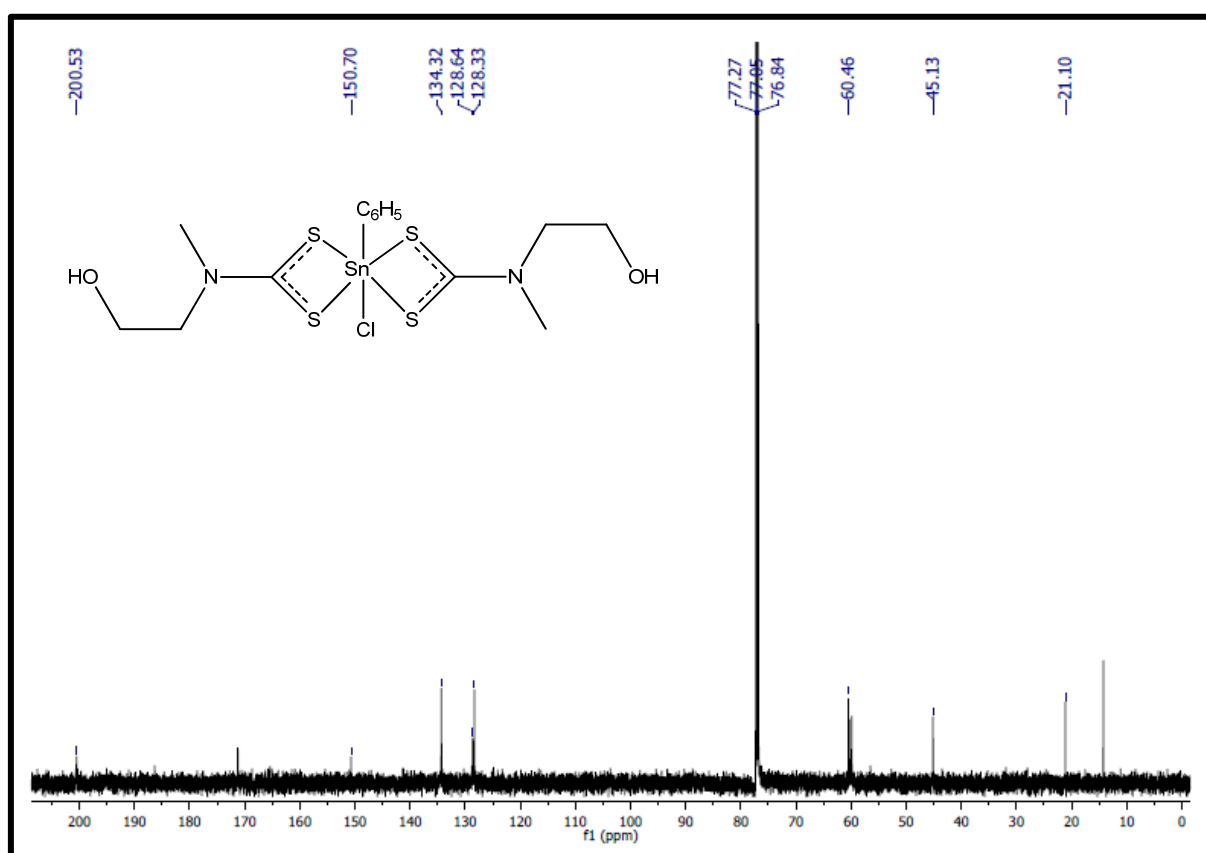

(b)

Figure S1. <sup>1</sup>H and <sup>13</sup>C spectra of (a) [(C<sub>6</sub>H<sub>5</sub>)<sub>2</sub>Sn(L)<sub>2</sub>] and (b) [(C<sub>6</sub>H<sub>5</sub>)(Cl)Sn(L)<sub>2</sub>]

**Table S1. Gaussian input file for conformer A of [(C<sub>6</sub>H<sub>5</sub>)<sub>2</sub>Sn(L)<sub>2</sub>]**

```
%mem=10GB
%CPU=0-23
%chk=Sncomplx_ph_cis.chk
# opt freq genecp m06

Sncomplx_ph_cis

0 1
Sn      0.03602369  0.23682095 -0.19792621
S      -1.32976711 -0.29117480  1.86099494
S      -2.86002604  0.36528424 -0.62733089
S       2.67062277  0.54379565 -1.54091413
S       2.03095240 -0.18694520  1.29502620
C      -2.84624659 -0.04211809  1.01364285
N      -3.96377195 -0.19478392  1.73580510
C      -3.91448186 -0.47248789  3.16408186
H      -2.99767444 -0.04096803  3.57051031
H      -4.76117810  0.00550277  3.65403128
C      -3.93711956 -1.95890527  3.43640383
H      -3.14290744 -2.45092986  2.85479924
H      -4.89767358 -2.36601851  3.09893800
O      -3.74356678 -2.12004747  4.81799216
H      -3.95055388 -3.02217688  5.06233305
C      -5.28091654 -0.01711719  1.14542309
H      -5.45871101 -0.74989411  0.35660063
H      -6.03038016 -0.14560544  1.92254137
H      -5.38924760  0.97901051  0.71357574
C       3.18801093  0.12659156  0.00799738
N       4.49130652  0.01805816  0.30633139
C       4.98199761 -0.38510785  1.61531213
H       5.92129148  0.14407102  1.80332274
H       4.27751354 -0.07792846  2.38718545
C       5.20513975 -1.88437654  1.69300255
H       4.24811381 -2.39449898  1.56444395
H       5.85597212 -2.20714365  0.86824973
O       5.71048473 -2.26606038  2.94439343
H       6.61013061 -1.94487824  3.02787156
C       5.48401983  0.20478813 -0.73892074
H       6.47417846  0.07621316 -0.30663798
H       5.34436408 -0.51727531 -1.54509616
H       5.40239731  1.20227560 -1.17227069
C      -0.10323978 -1.48871374 -1.42053492
C      -0.17652414 -1.38909859 -2.80425394
C      -0.14820146 -2.74156421 -0.82671957
C      -0.29524982 -2.52596060 -3.58344983
H      -0.13471790 -0.41715966 -3.28722649
C      -0.26099496 -3.88222849 -1.60753504
H      -0.09552164 -2.83827706  0.25301062
C      -0.33631425 -3.77504870 -2.98445828
H      -0.35259392 -2.43838022 -4.66113320
H      -0.29011927 -4.85674484 -1.13618317
H      -0.42554933 -4.66528704 -3.59398339
C      -0.03281228  2.34079236 -0.44074079
C      -0.52918907  2.91803930 -1.60251940
C       0.45533436  3.15798458  0.56873156
```

|   |             |            |             |
|---|-------------|------------|-------------|
| C | -0.53180839 | 4.29324388 | -1.75591152 |
| H | -0.92800564 | 2.29597427 | -2.39800060 |
| C | 0.44179995  | 4.53638504 | 0.42049570  |
| H | 0.85129612  | 2.72374149 | 1.48131844  |
| C | -0.04804670 | 5.10403828 | -0.74208937 |
| H | -0.91752477 | 4.73387592 | -2.66661108 |
| H | 0.81709838  | 5.16724289 | 1.21658917  |
| H | -0.05546997 | 6.18025067 | -0.85901215 |

C H N O S 0

cc-pVTZ

\*\*\*\*

Sn 0

LANL2DZ

\*\*\*\*

Sn 0

LANL2DZ

### Gaussian input file for conformer B of [(C<sub>6</sub>H<sub>5</sub>)<sub>2</sub>Sn(L)<sub>2</sub>]

%mem=10GB

%CPU=0-23

%chk=Sncomplx\_ph\_new.chk

# opt freq genecp m06

Sncomplx\_ph\_cis

0 1

|    |             |             |             |
|----|-------------|-------------|-------------|
| Sn | 0.00350940  | -0.00534824 | -0.22932078 |
| S  | 1.78299587  | -1.83929104 | -0.16929713 |
| S  | 2.30109057  | 1.11251539  | -0.25298463 |
| S  | -1.78346176 | 1.82635658  | -0.26885192 |
| S  | -2.29344910 | -1.12618958 | -0.17351114 |
| C  | 2.88654872  | -0.51305742 | -0.20618026 |
| N  | 4.19424558  | -0.76013419 | -0.19280287 |
| C  | 5.18522462  | 0.30746628  | -0.16617447 |
| H  | 6.07363902  | -0.03030463 | -0.70209169 |
| H  | 4.79763601  | 1.18093013  | -0.68914564 |
| C  | 5.55522233  | 0.67438128  | 1.25342093  |
| H  | 5.87131238  | -0.23004197 | 1.79412639  |
| H  | 4.66857754  | 1.07076058  | 1.76328129  |
| O  | 6.58878254  | 1.61762560  | 1.16369577  |
| H  | 6.74270994  | 2.00311513  | 2.02662455  |
| C  | 4.68578499  | -2.12654798 | -0.09378012 |
| H  | 4.34030318  | -2.72050074 | -0.94097219 |
| H  | 5.77241556  | -2.10655649 | -0.09032731 |
| H  | 4.33369350  | -2.60200264 | 0.82318596  |
| C  | -2.88209677 | 0.49691491  | -0.22671151 |
| N  | -4.19174613 | 0.74084686  | -0.23103898 |
| C  | -5.18069557 | -0.32622800 | -0.14636589 |
| H  | -6.05432797 | -0.02292019 | -0.72991948 |
| H  | -4.78204010 | -1.23204083 | -0.60182491 |
| C  | -5.57755159 | -0.60454154 | 1.29281343  |
| H  | -4.70056439 | -0.94788641 | 1.84568634  |

|   |             |             |             |
|---|-------------|-------------|-------------|
| H | -5.91725973 | 0.32391666  | 1.77265026  |
| O | -6.53819187 | -1.62116090 | 1.36703576  |
| H | -7.37694056 | -1.28630754 | 1.04485693  |
| C | -4.68569322 | 2.10932357  | -0.20779873 |
| H | -5.77246821 | 2.08899026  | -0.22189612 |
| H | -4.35017553 | 2.63084980  | 0.69023024  |
| H | -4.32695322 | 2.66140051  | -1.07746302 |
| C | 0.00780523  | 0.06482999  | 1.93953987  |
| C | 0.12626757  | 1.28934326  | 2.59757129  |
| C | -0.10796998 | -1.11418602 | 2.67579085  |
| C | 0.12962354  | 1.33466955  | 3.99154260  |
| H | 0.21829896  | 2.21860195  | 2.01683874  |
| C | -0.10562104 | -1.06892170 | 4.07019234  |
| H | -0.20152443 | -2.07936223 | 2.15732054  |
| C | 0.01328600  | 0.15521462  | 4.72813489  |
| H | 0.22362415  | 2.29974512  | 4.51028100  |
| H | -0.19733353 | -1.99864539 | 4.65043100  |
| H | 0.01589750  | 0.19120717  | 5.82722272  |
| C | -0.00459955 | -0.06776420 | -2.39840780 |
| C | 0.16565503  | 1.10750815  | -3.13067804 |
| C | -0.17990371 | -1.28280879 | -3.06058846 |
| C | 0.15991813  | 1.06774839  | -4.52481146 |
| H | 0.30306885  | 2.06537649  | -2.60832999 |
| C | -0.18468144 | -1.32289462 | -4.45514222 |
| H | -0.31392653 | -2.20922785 | -2.48360090 |
| C | -0.01494766 | -0.14787632 | -5.18730302 |
| H | 0.29348113  | 1.99415993  | -5.10206278 |
| H | -0.32251099 | -2.28110778 | -4.97697053 |
| H | -0.01937679 | -0.17898660 | -6.28653406 |

C H N O S 0

cc-pVTZ

\*\*\*\*

Sn 0

LANL2DZ

\*\*\*\*

Sn 0

LANL2DZ

# **Gaussian input file for conformer A of [(C6H5)(Cl)Sn(L)2]**

%mem=10GB

%CPU=0-23

%chk=Sncomplx\_Clph\_cis.chk

# opt freq genecp m06

Sncomplx\_Clph\_cis

0 1

|    |             |             |             |
|----|-------------|-------------|-------------|
| Sn | -0.00531159 | -0.18538193 | -0.00061126 |
| S  | -1.82576199 | -0.23254840 | 1.85094375  |
| S  | -2.35236716 | -0.23600488 | -1.11102484 |
| S  | 1.82392790  | -0.24916921 | -1.84927723 |
| S  | 2.34044025  | -0.25602360 | 1.11425515  |

|    |             |             |             |
|----|-------------|-------------|-------------|
| C  | -2.92423916 | -0.21807786 | 0.51979785  |
| N  | -4.23498356 | -0.20839437 | 0.77100216  |
| C  | -4.76782031 | -0.08556753 | 2.12079579  |
| H  | -4.05835477 | 0.48427488  | 2.72329335  |
| H  | -5.70341914 | 0.47128272  | 2.09726627  |
| C  | -4.99062895 | -1.44318515 | 2.74803334  |
| H  | -4.06062042 | -2.02830579 | 2.69385092  |
| H  | -5.75386312 | -1.98152124 | 2.17319043  |
| O  | -5.38402756 | -1.21083699 | 4.07475229  |
| H  | -5.69970285 | -2.02908675 | 4.45894457  |
| C  | -5.19675700 | -0.21278099 | -0.32052262 |
| H  | -5.09821809 | -1.11977306 | -0.91860657 |
| H  | -6.19871376 | -0.16748308 | 0.09870670  |
| H  | -5.04469737 | 0.64468438  | -0.97803882 |
| C  | 2.91634552  | -0.23426672 | -0.51408736 |
| N  | 4.22925271  | -0.22101644 | -0.76093639 |
| C  | 5.22248094  | -0.25693920 | 0.30407369  |
| H  | 6.08955154  | 0.32357853  | -0.02406236 |
| H  | 4.82279357  | 0.22566944  | 1.19490940  |
| C  | 5.63680346  | -1.68014568 | 0.63267148  |
| H  | 4.76983094  | -2.22706400 | 1.00884509  |
| H  | 5.96947259  | -2.19246424 | -0.28094796 |
| O  | 6.61225769  | -1.70746562 | 1.63883384  |
| H  | 7.43967458  | -1.37972927 | 1.28197519  |
| C  | 4.72334827  | -0.28255284 | -2.12743819 |
| H  | 5.81045007  | -0.28532822 | -2.10554837 |
| H  | 4.37418696  | -1.18638250 | -2.62941317 |
| H  | 4.37890880  | 0.57832100  | -2.70215712 |
| Cl | -0.01462071 | -2.59730485 | -0.00597580 |
| C  | 0.00727251  | 1.97664287  | -0.00466490 |
| C  | -0.19911511 | 2.68072334  | -1.18173122 |
| C  | 0.21998890  | 2.68199725  | 1.17051307  |
| C  | -0.19320447 | 4.06659242  | -1.18686196 |
| H  | -0.36886104 | 2.15226499  | -2.11530767 |
| C  | 0.22681394  | 4.06790566  | 1.17179447  |
| H  | 0.38416143  | 2.15457398  | 2.10565892  |
| C  | 0.02002569  | 4.76122048  | -0.00847959 |
| H  | -0.35624991 | 4.60411013  | -2.11283117 |
| H  | 0.39399601  | 4.60641917  | 2.09644617  |
| H  | 0.02464514  | 5.84391937  | -0.00990617 |

C H N O Cl S O

cc-pVTZ

\*\*\*\*

Sn 0

LANL2DZ

\*\*\*\*

Sn 0

LANL2DZ

**Gaussian input file for conformer B of [(C<sub>6</sub>H<sub>5</sub>)(Cl)Sn(L)<sub>2</sub>]**

%mem=10GB

%CPU=0-23  
%chk=Sncomplx\_Cl.chk  
# opt freq genecp m06

Sncomplx\_Cl

0 1

|    |             |             |             |
|----|-------------|-------------|-------------|
| Sn | -1.31715670 | 1.37373368  | -0.54579608 |
| S  | -1.32111749 | 1.37375680  | -2.95599589 |
| S  | -3.72715217 | 1.37373368  | -0.54112295 |
| S  | -1.11821625 | 1.38524547  | 1.82718094  |
| S  | 1.09121442  | 1.37589272  | -0.51920488 |
| C  | -3.19640868 | 1.31288680  | -2.41806065 |
| N  | -4.17172175 | 1.29887522  | -3.51781884 |
| C  | -5.08899245 | 2.43851560  | -3.37382483 |
| H  | -5.68114595 | 2.31052432  | -2.49185405 |
| H  | -4.52373986 | 3.34365693  | -3.29566667 |
| C  | -6.01122503 | 2.51390910  | -4.60484184 |
| H  | -6.59666164 | 1.62044394  | -4.66716342 |
| H  | -5.41773365 | 2.61387598  | -5.48953083 |
| O  | -6.87834824 | 3.64438700  | -4.48229768 |
| H  | -7.51581946 | 3.63858658  | -5.20006979 |
| C  | -4.93793093 | 0.04500858  | -3.47729800 |
| H  | -5.61277239 | 0.06606826  | -2.64721035 |
| H  | -5.49305181 | -0.06326934 | -4.38560230 |
| H  | -4.26568522 | -0.78045126 | -3.36958659 |
| C  | 0.79591324  | 1.49867199  | 1.46243553  |
| N  | 1.95206931  | 1.57322994  | 2.36722516  |
| C  | 2.06044555  | 0.32014115  | 3.12809510  |
| H  | 2.90588085  | 0.37184460  | 3.78190387  |
| H  | 1.17132948  | 0.17545855  | 3.70553735  |
| C  | 2.23685019  | -0.85879756 | 2.15311566  |
| H  | 1.28839802  | -1.32240444 | 1.97873922  |
| H  | 2.63378007  | -0.49924079 | 1.22679736  |
| O  | 3.13773567  | -1.81446833 | 2.71879998  |
| H  | 4.01972622  | -1.43772627 | 2.76072963  |
| C  | 1.77458985  | 2.69753552  | 3.29746061  |
| H  | 2.62966840  | 2.77004225  | 3.93658771  |
| H  | 1.66605718  | 3.60590498  | 2.74249613  |
| H  | 0.89885826  | 2.53503105  | 3.89040790  |
| Cl | -1.39518704 | 3.76242511  | -0.55862245 |
| Cl | -1.39205614 | -1.01509197 | -0.54723678 |

C H N O Cl 0

cc-pVTZ

\*\*\*\*

Sn 0

LANL2DZ

\*\*\*\*

Sn 0

LANL2DZ
